# Supplementary material for: Targeting neural circuitry in zebrafish using GAL4 enhancer trapping
Source: Springer Nature journal article supplement (doi:10.1038/nmeth1033), 2007-03-18
Supplement: nmeth1033-S2.pdf [file nmeth1033-S2.pdf]

**Supplementary Table 1: Summary of ET lines**

| ET insertion   | Transgenic line number | Description of expression pattern                |
|----------------|------------------------|--------------------------------------------------|
| <i>et10.1</i>  | <i>s1000t</i>          | Pallium and hindbrain                            |
| <i>et10.4</i>  | <i>s1001t</i>          | Cristae and lateral line neuromasts              |
| <i>et11.1</i>  | <i>s1002t</i>          | Cristae and circulating blood cells              |
| <i>et19.1</i>  | <i>s1003t</i>          | Retina, spinal cord, and blood vessels           |
| <i>et25.2</i>  | <i>s1004t</i>          | Spinal cord and habenulae                        |
| <i>et28.2</i>  | <i>s1005t</i>          | Gut and sparse cells in ear and spinal cord      |
| <i>et29.4</i>  | <i>s1006t</i>          | Sensory cranial ganglia and lateral line ganglia |
| <i>et30.1</i>  | <i>s1007t</i>          | Eye, pallium, hindbrain, and spinal cord         |
| <i>et30.2</i>  | <i>s1008t</i>          | Neurons in lower jaw                             |
| <i>et30.3</i>  | <i>s1009t</i>          | Hindbrain                                        |
| <i>et30.4</i>  | <i>s1010t</i>          | Trigeminal and vagal sensory ganglia             |
| <i>et32</i>    | <i>s1011t</i>          | Habenulae, hindbrain, and spinal cord            |
| <i>et33.3</i>  | <i>s1012t</i>          | Hindbrain, spots on skin                         |
| <i>et36.1</i>  | <i>s1013t</i>          | Pallium, tectum, hindbrain, and spinal cord      |
| <i>et41.3</i>  | <i>s1014t</i>          | Paired midbrain nuclei                           |
| <i>et53.1</i>  | <i>s1015t</i>          | Paired forebrain nuclei                          |
| <i>et58.1</i>  | <i>s1016t</i>          | Blood vessels, neurons in two rhombomeres        |
| <i>et68</i>    | <i>s1017t</i>          | Retina, cristae, and hypothalamus                |
| <i>et204</i>   | <i>s1018t</i>          | Tectum, muscle                                   |
| <i>et206</i>   | <i>s1019t</i>          | Habenulae                                        |
| <i>et208.1</i> | <i>s1020t</i>          | Thalamus, spinal cord                            |
| <i>et210.1</i> | <i>s1021t</i>          | Pallium and sensory cranial ganglia              |

Supplementary Table 1: Expression patterns for ET lines. For each expression pattern, the corresponding transgenic line number and a brief description of the tissues with the most prominent expression are given. Most lines also have background expression in the heart and muscle. Lines *s1000t* through *s1017t* carry the 1.5kb HSP promoter while lines *s1018t* through *s1021t* carry the 600bp HSP promoter.
