# Supplementary material for: Targeting neural circuitry in zebrafish using GAL4 enhancer trapping
Source: Springer Nature journal article supplement (doi:10.1038/nmeth1033), 2007-03-18
Supplement: nmeth1033-S4.pdf [file nmeth1033-S4.pdf]

**Supplementary Table 3: Integration Sites**

| ET insertion    | Chromosome & Position       | Nearest Gene and description                                  | Insertion position vs nearest gene |
|-----------------|-----------------------------|---------------------------------------------------------------|------------------------------------|
| <i>et10.1</i>   | Ch10: bp21,730,662          | Novel predicted gene, Similar to mannose receptor, C type 2   | 4th intron                         |
| <i>et10.4</i>   | Ch2: bp43,825,248           | zgc:110183<br>unknown function                                | 1.5kb upstream                     |
| <i>et30.4</i>   | Ch22: bp3,944,788           | zgc:110764<br>Mitochondrial import inner membrane translocase | 12.2kb downstream                  |
| <i>et58.1</i>   | Ch20: bp25,029,937          | rtn1b<br>reticulon 1-like                                     | 1st intron                         |
| <i>et204</i>    | Ch11: bp44,796,716          | pax7<br>paired box gene 7                                     | 4th intron                         |
| <i>et206</i> *  | Ch10: bp11,016,855          | Mrrf<br>mitochondrial ribosome recycling factor               | 5.5kb downstream                   |
| <i>et208</i> ** | Ch9: bp22,786 on CT030044.6 | unknown                                                       | unknown                            |

Supplementary Table 3: Insertion sites resulting in enhancer trap patterns of interest.

For each enhancer trap insertion shown, the chromosome and location on the chromosome are indicated. The nearest gene or predicted gene is identified, along with the insertion's proximity to that gene.

\*The genomic region flanking insertion *et206* is most strongly aligned with the indicated location on chromosome 10, but is also highly similar to the region flanking chromosome 4, bp42,770,860

\*\**et208* was localized to a sequenced genomic clone, but could not be linked to an assembled genomic contig, and is therefore not linked to a nearest gene.
